# Supplementary material for: Complexes of D-type cyclins with CDKs during maize germination
Source: PubMed Central journal article supplement (PMC3871821; doi:10.1093/jxb/ert340), 2013-10-14
Supplement: supp_ert340_jexbot109082_file001.pdf [file supp_ert340_jexbot109082_file001.pdf]

# COMPLEXES OF D-TYPE CYCLINS WITH CDKS DURING MAIZE GERMINATION

Silvia K Godínez-Palma<sup>1</sup>, Elpidio García<sup>1</sup>, María de La Paz Sánchez<sup>2</sup>, Fernando Rosas<sup>1</sup>, Jorge M Vázquez-Ramos<sup>1</sup>



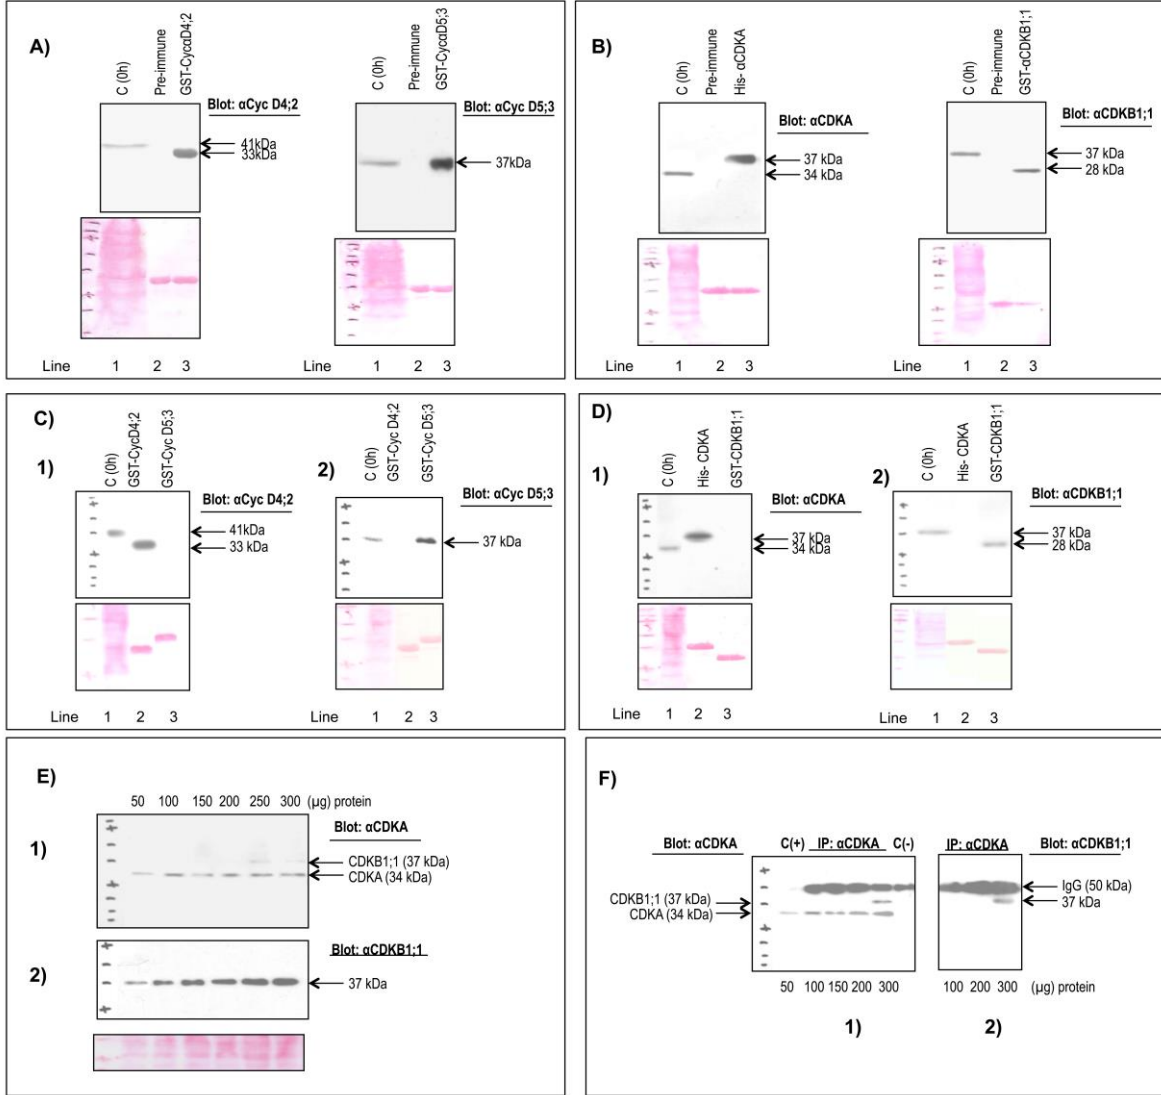

**FIGURE S2**

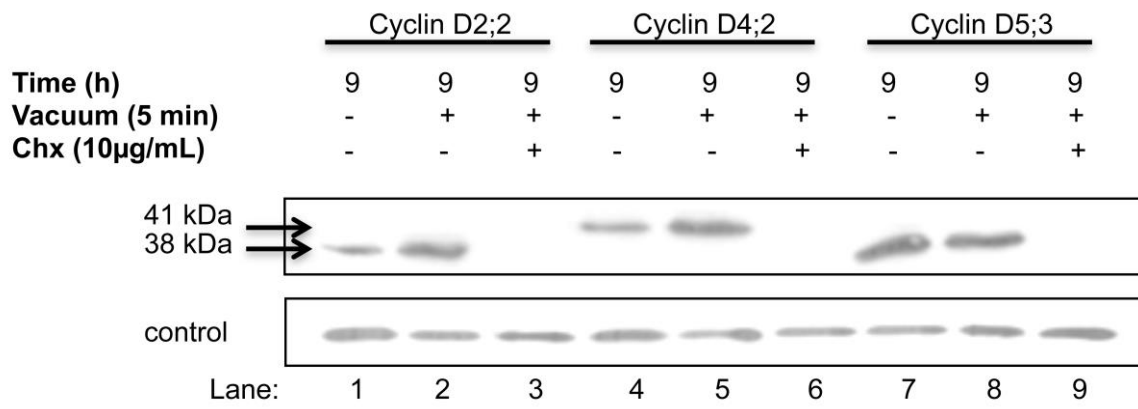

**FIGURE S3**

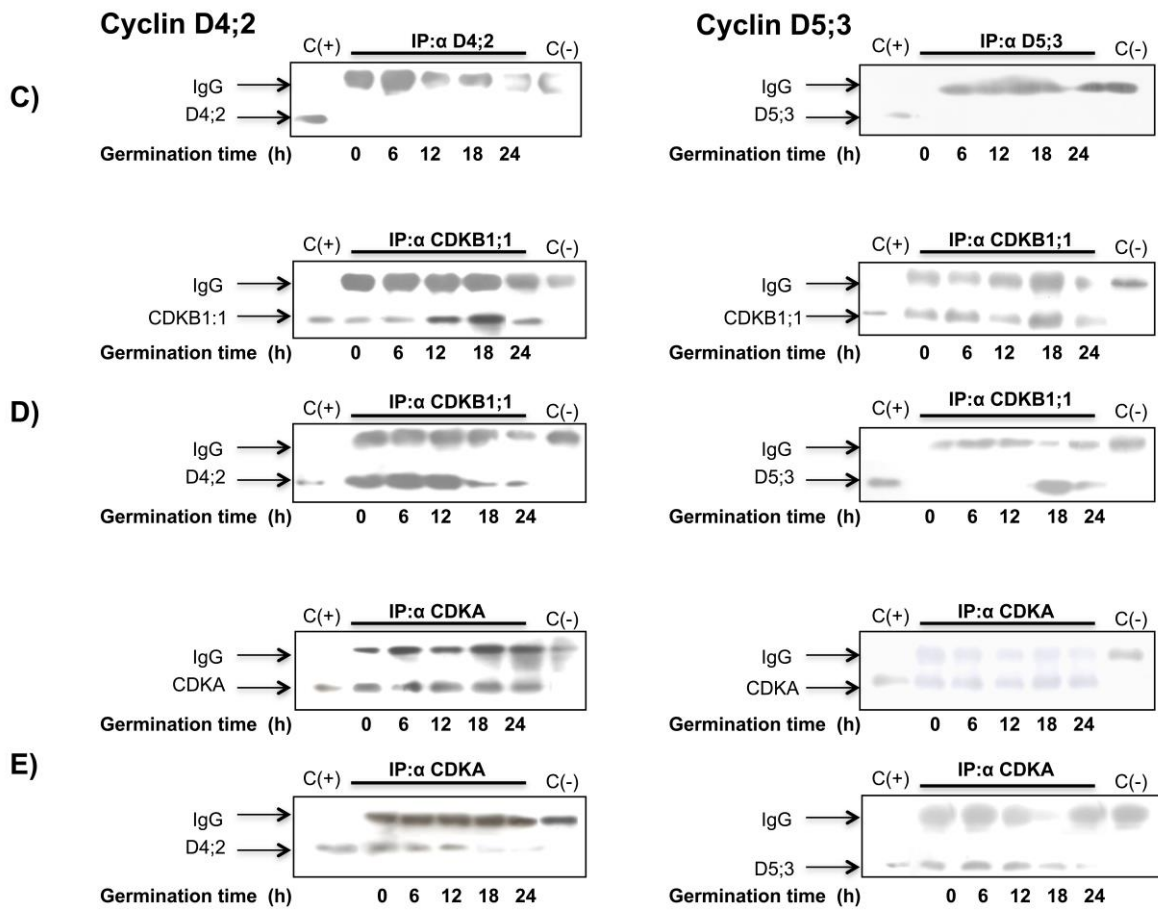

**FIGURE S4**

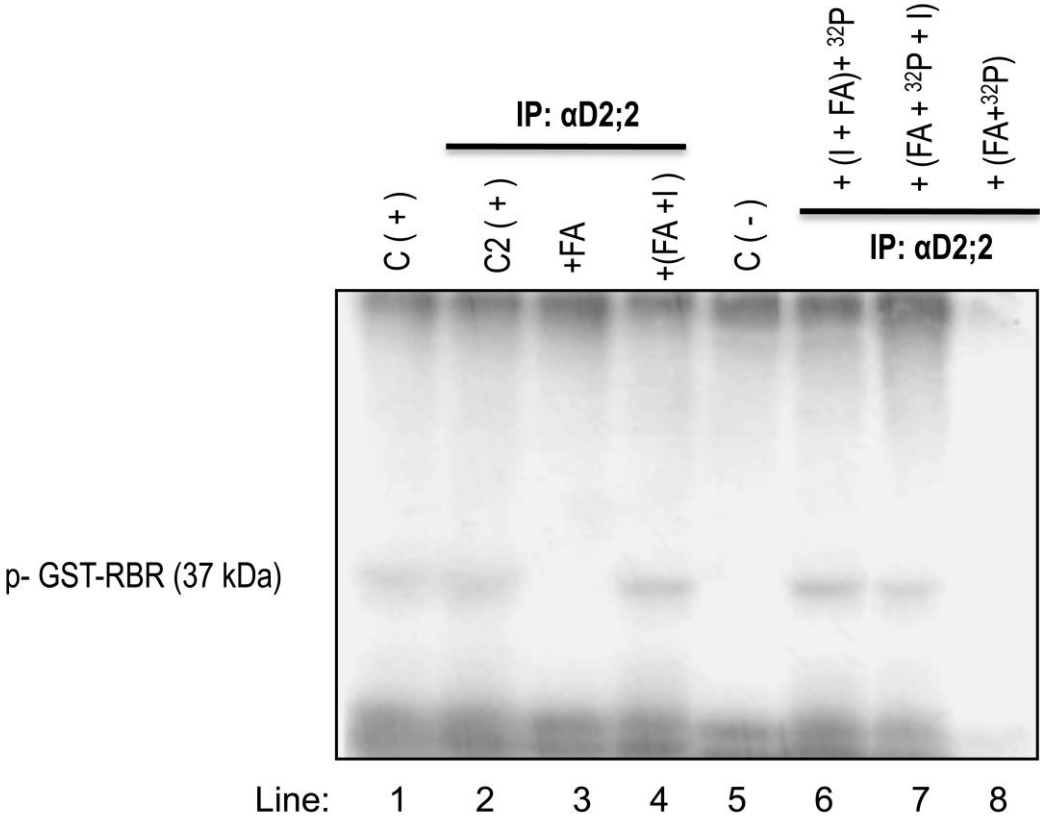

FIGURE S5

A)

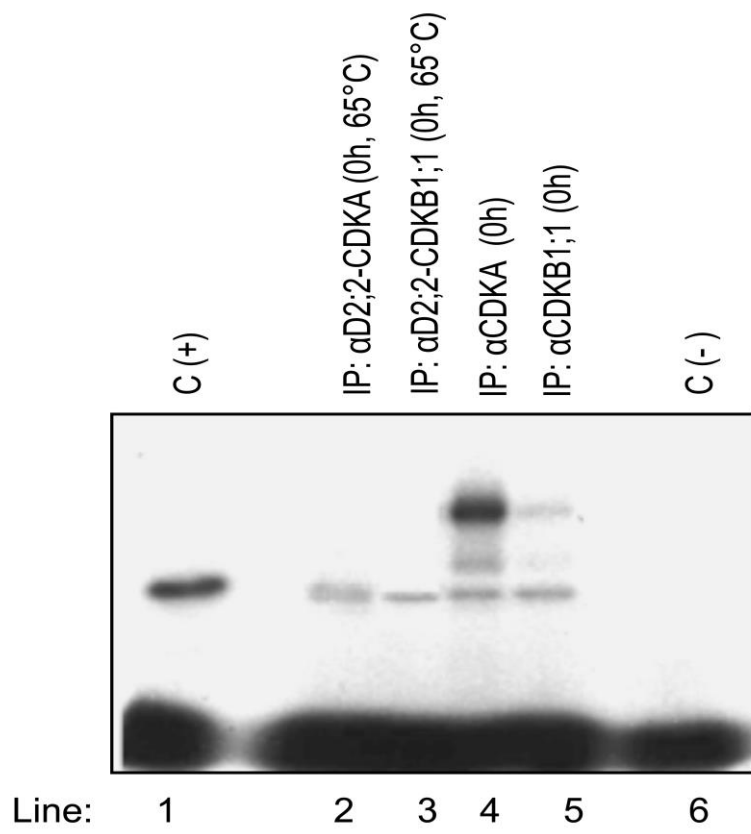

B)

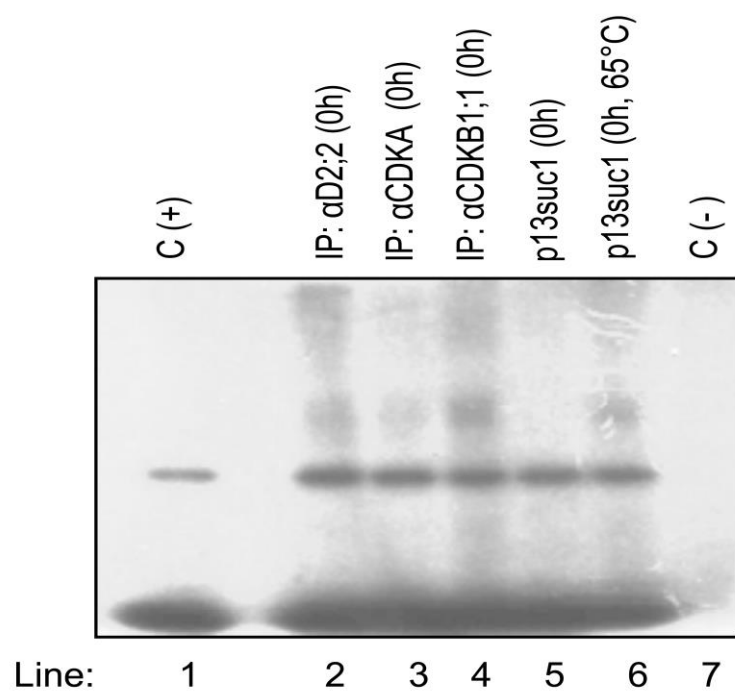

FIGURE S6

## Supplementary data.

**Supplementary Figure S1.** Comparison of maize D-type Cyclins sequences. A) Alignment of carboxyl ends of the 17 maize D-type Cyclins and percentage identity of Cyclins D4;2 and D5;3 compared to all maize cyclins. B) Comparison of maize CDK sequences. Motif 1, sequence used for production of anti-CDKB1;1 antibodies; Motif 2, canonical PSTAIRE-Cyclin binding sequence (in Cdc2-type kinases like CDKA), PPTAL(M)RE in CDKB. (\*) Represents phosphorylatable T14, Y15 and T160 residues, conserved in all CDKs.

**Supplementary Figure S2.** Validation of antibodies against D-type cyclins and CDKs. Panels A and B, lanes 1 and 3, protein extracts from non-imbibed maize axes and recombinant proteins incubated with the corresponding antibody, lanes 2, recombinant proteins incubated only with pre-immune serum. Panel A, antibodies against GST-Cyclin D4;2 and GST-CyclinD5;3; Panel B, antibodies against His-CDKA and GST-CDKB1;1. Panels C and D, Specificity of antibodies. Panel C, lanes 1, protein extracts from non-imbibed maize axes, lanes 2, GST-CycD4;2, lanes 3, GST-CycD5;3; C1), Western blot using anti-CycD4;2 antibody, C2) Western blot using anti-CycD5;3 antibody. Panel D, lanes 1, protein extracts from non-imbibed maize axes, lanes 2, His-CDKA, lanes 3, GST-CDKB1;1; D1), Western blot using anti-CDKA antibody, D2), western blot using anti-CDKB1;1 antibody. Panels E and F, recognition of CDKs. Panel E1, increasing concentrations of protein extracts (50 to 300 µg) from non-imbibed maize axes and recognition of CDKs using the anti-CDKA antibody. Notice the recognition of a 37kDa band (CDKB1;1) at 250 µg protein; panel E2, same as above but recognition with anti-CDKB1;1 antibody (only CDKB1;1 is recognized). Membranes stained with Ponceau Red are shown as loading control. Panel F, immunoprecipitation with anti-CDKA antibody. F1, immunoprecipitation of samples with increasing concentrations of protein extracts (100 to 300 µg) from non-imbibed maize axes, using anti-CDKA antibody and recognition by anti-CDKA antibodies of



34 kDa (CDKA) and 37 kDa (CDKB1;1) bands, the latter is observed only in the 300 µg sample. F2, western blot using anti-CDKB1;1 antibody of proteins immunoprecipitated by anti-CDKA antibodies in samples of increasing concentrations of protein extracts from non-imbibed maize axes (150, 200 y 300 µg). Only the 37 kDa band is detected at 300 µg. C(+), proteins extracts from non-imbibed axes (50 µg); C(-), immunoprecipitation with anti-CDKA antibody, no protein extract added.

**Supplementary Figure S3.** Stability of Cyclins D during germination. Maize embryo axes were imbibed for 9 h in the presence of cycloheximide (introduced by means of vacuum) and then the presence of Cyclins D was followed by western blot. Lanes 1, 4 and 7, protein extracts from 9 h imbibed maize axes in the absence of cycloheximide. Lanes 2, 5 and 8, protein extracts from 9 h imbibed maize axes, with a 5 min vacuum treatment at the beginning of the imbibition time. Lane 3, 6 and 9, protein extracts from 9 h imbibed maize axes, treated with vacuum and cycloheximide. Loading control as in Fig. 2.

**Supplementary Figure S4.** Validation of the sequential immunoprecipitation technique (according to Fig. 5). Lane C) Immunoprecipitation (0, 6, 12, 18 and 24h germination) and western blot of each one of D-type Cyclins after heat treatment (65°C, 3h) and removal of D-type Cyclins-CDKs complexes. Lane D) Immunoprecipitation of CDKB1;1 from the supernatant containing D-type Cyclins-CDKs complexes from step B and identification of CDKB1;1 and D-type Cyclins by western blot. Lane E) Immunoprecipitation of CDKA from the supernatant obtained in step D and identification of CDKA and D-type Cyclins by western blot. Positive control, identification of the target protein in protein extracts from non-germinated seed axes. Negative control, high molecular weight IgGs.

**Supplementary Figure 5.** Alkaline phosphatase and CDK activity. Lane 1 (C+), kinase activity in cyclin-CDK complexes pulled down by CKS protein; lane 2, kinase activity in anti-CycD2;2 immunoprecipitate; lane 3, dephosphorylation of

substrate used in lane 2 (RBR protein) by alkaline phosphatase; lane 4, inhibition of alkaline phosphatase activity by 40 min pre-incubation with inhibitor and kinase activity in anti-CycD2;2 immunoprecipitate; lane 5 C(-), anti-CycD2;2 immunoprecipitate with no protein extract added; lane 6, pre-incubation of alkaline phosphatase with inhibitor (40 min), then substrate and  $^{32}\text{P}$  were added and then incubation with anti-CycD2;2 immunoprecipitate; lane 7, pre-incubation of alkaline phosphatase with  $^{32}\text{P}$  and inhibitor, then the substrate and finally anti-CycD2;2 immunoprecipitate; lane 8, preincubation of alkaline phosphatase and  $^{32}\text{P}$  (40 min), then the kinase assay.

**Supplementary Figure 6.** Kinase activity after a high temperature treatment. Panel A, lane 1 (C+), kinase activity in cyclin-CDK complexes bound to CKS protein; lane 2, kinase activity in CycD2;2-CDKA complexes (heat-treated); lane 3, kinase activity in CycD2;2-CDKB1;1 complexes (heat-treated); lane 4, kinase activity in anti-CDKA immunoprecipitates (no heat treatment); lane 5, kinase activity in anti-CDKB1;1 immunoprecipitates (no heat treatment); lane 6 (C-), kinase activity in anti-CycD2;2 immunoprecipitates with no protein extract added. Panel B, lane 1 (C+), kinase activity in cyclin-CDK complexes bound to CKS protein, lane 2, kinase activity in anti-CycD2;2 immunoprecipitates; lane 3, kinase activity in anti-CDKA immunoprecipitates; lane 4, kinase activity in anti-CDKB1;1 immunoprecipitates; lane 5, kinase activity in cyclin-CDK complexes pulled down by a p13Suc1 resin; lane 6, kinase activity in cyclin-CDK complexes pulled down by a p13Suc1 resin treated at 65°C for 3h; lane 7, kinase activity in anti-CycD2;2 immunoprecipitates with no protein extract added.
